# Supplementary material
Source: PubMed Central journal article supplement (PMC3503487)
Supplement: NIHMS415202-supplement-06.pdf [file NIHMS415202-supplement-06.pdf]

### **Table S5. Genomic Coordinates, Related to Extended Experimental Procedures**

pCRM activity was assessed using luciferase reporter assays by cloning the ChIP-defined genomic region (average of approx. 750bp) upstream of a minimal promoter driving a luciferase gene (pGL4.23[luc2/minP]; Promega). Importantly, pCRMs were selected in a non-biased manner based on ranked average binding ChIP p-values for occupying TFs. Genomic coordinates are as follows:

| <u>TF order</u> | <u>pCRM genomic coordinates</u> |
|-----------------|---------------------------------|
| 1               | chr3:78762692-78763270          |
| 1               | chr1:43196384-43196904          |
| 1               | chr18:75739077-75739648         |
| 1               | chr5:138093690-138094176        |
| 1               | chr10:94880166-94880778         |
| 2               | chr17:55841782-55842285         |
| 2               | chr11:109482382-109482946       |
| 2               | chr11:44503354-44503971         |
| 2               | chr3:103188727-103189193        |
| 3               | chr1:155559667-155560272        |
| 3               | chr1:184030446-184030992        |
| 3               | chr4:59821894-59822386          |
| 3               | chr12:33858479-33858979         |
| 4               | chr15:9457605-9458144           |
| 4               | chr11:44449580-44450262         |
| 4               | chr12:101985209-101985820       |
| 4               | chr14:52642471-52643107         |
| 5               | chr1:20730409-20731129          |
