# Supplementary material
Source: PubMed Central journal article supplement (PMC3503487)

Figure S2

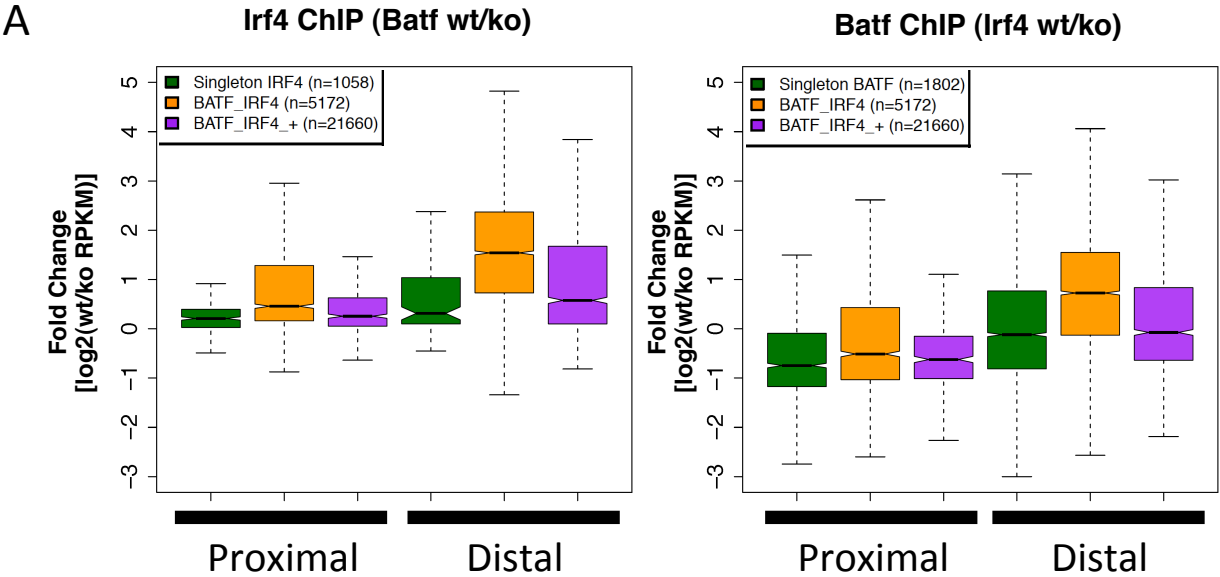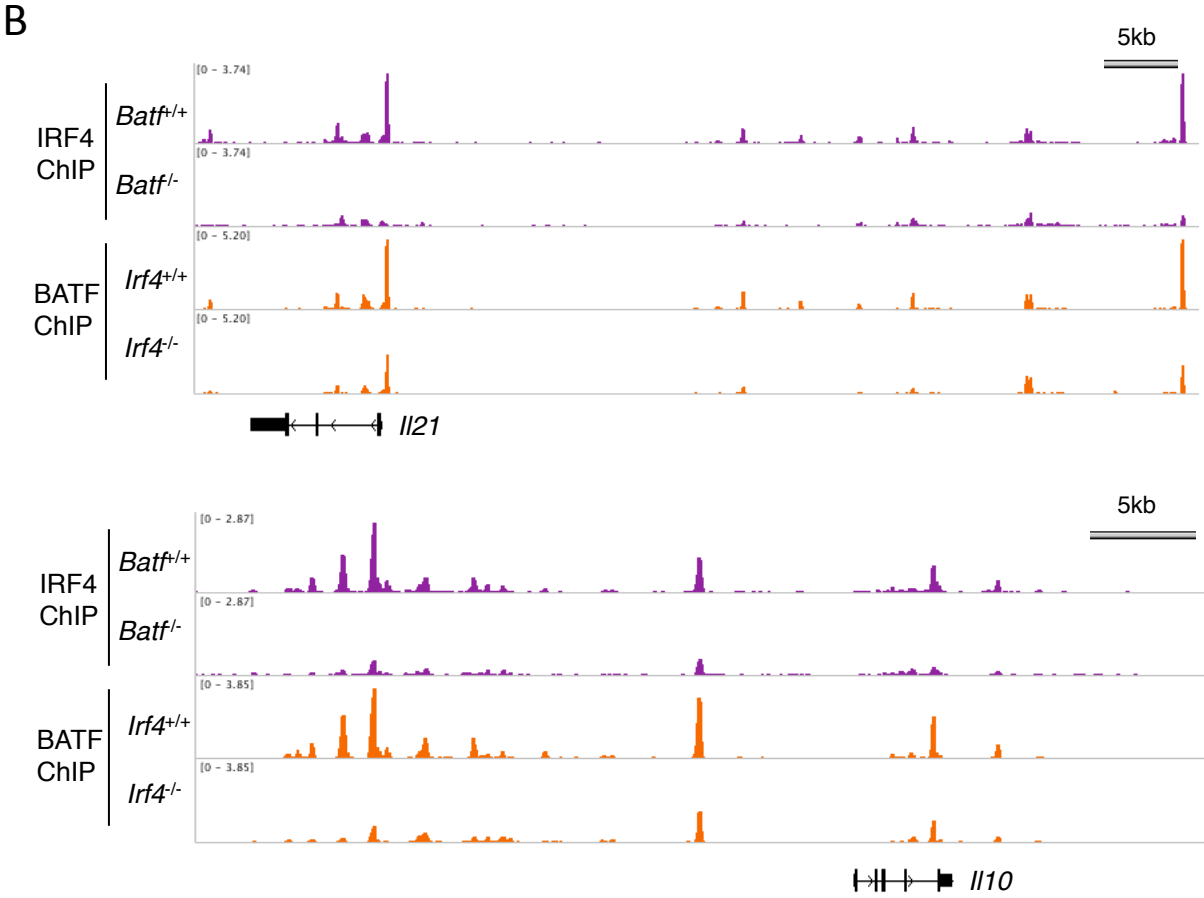

Supplement: NIHMS415202-supplement-Figure_S2.pdf [file NIHMS415202-supplement-Figure_S2.pdf]

Figure S3

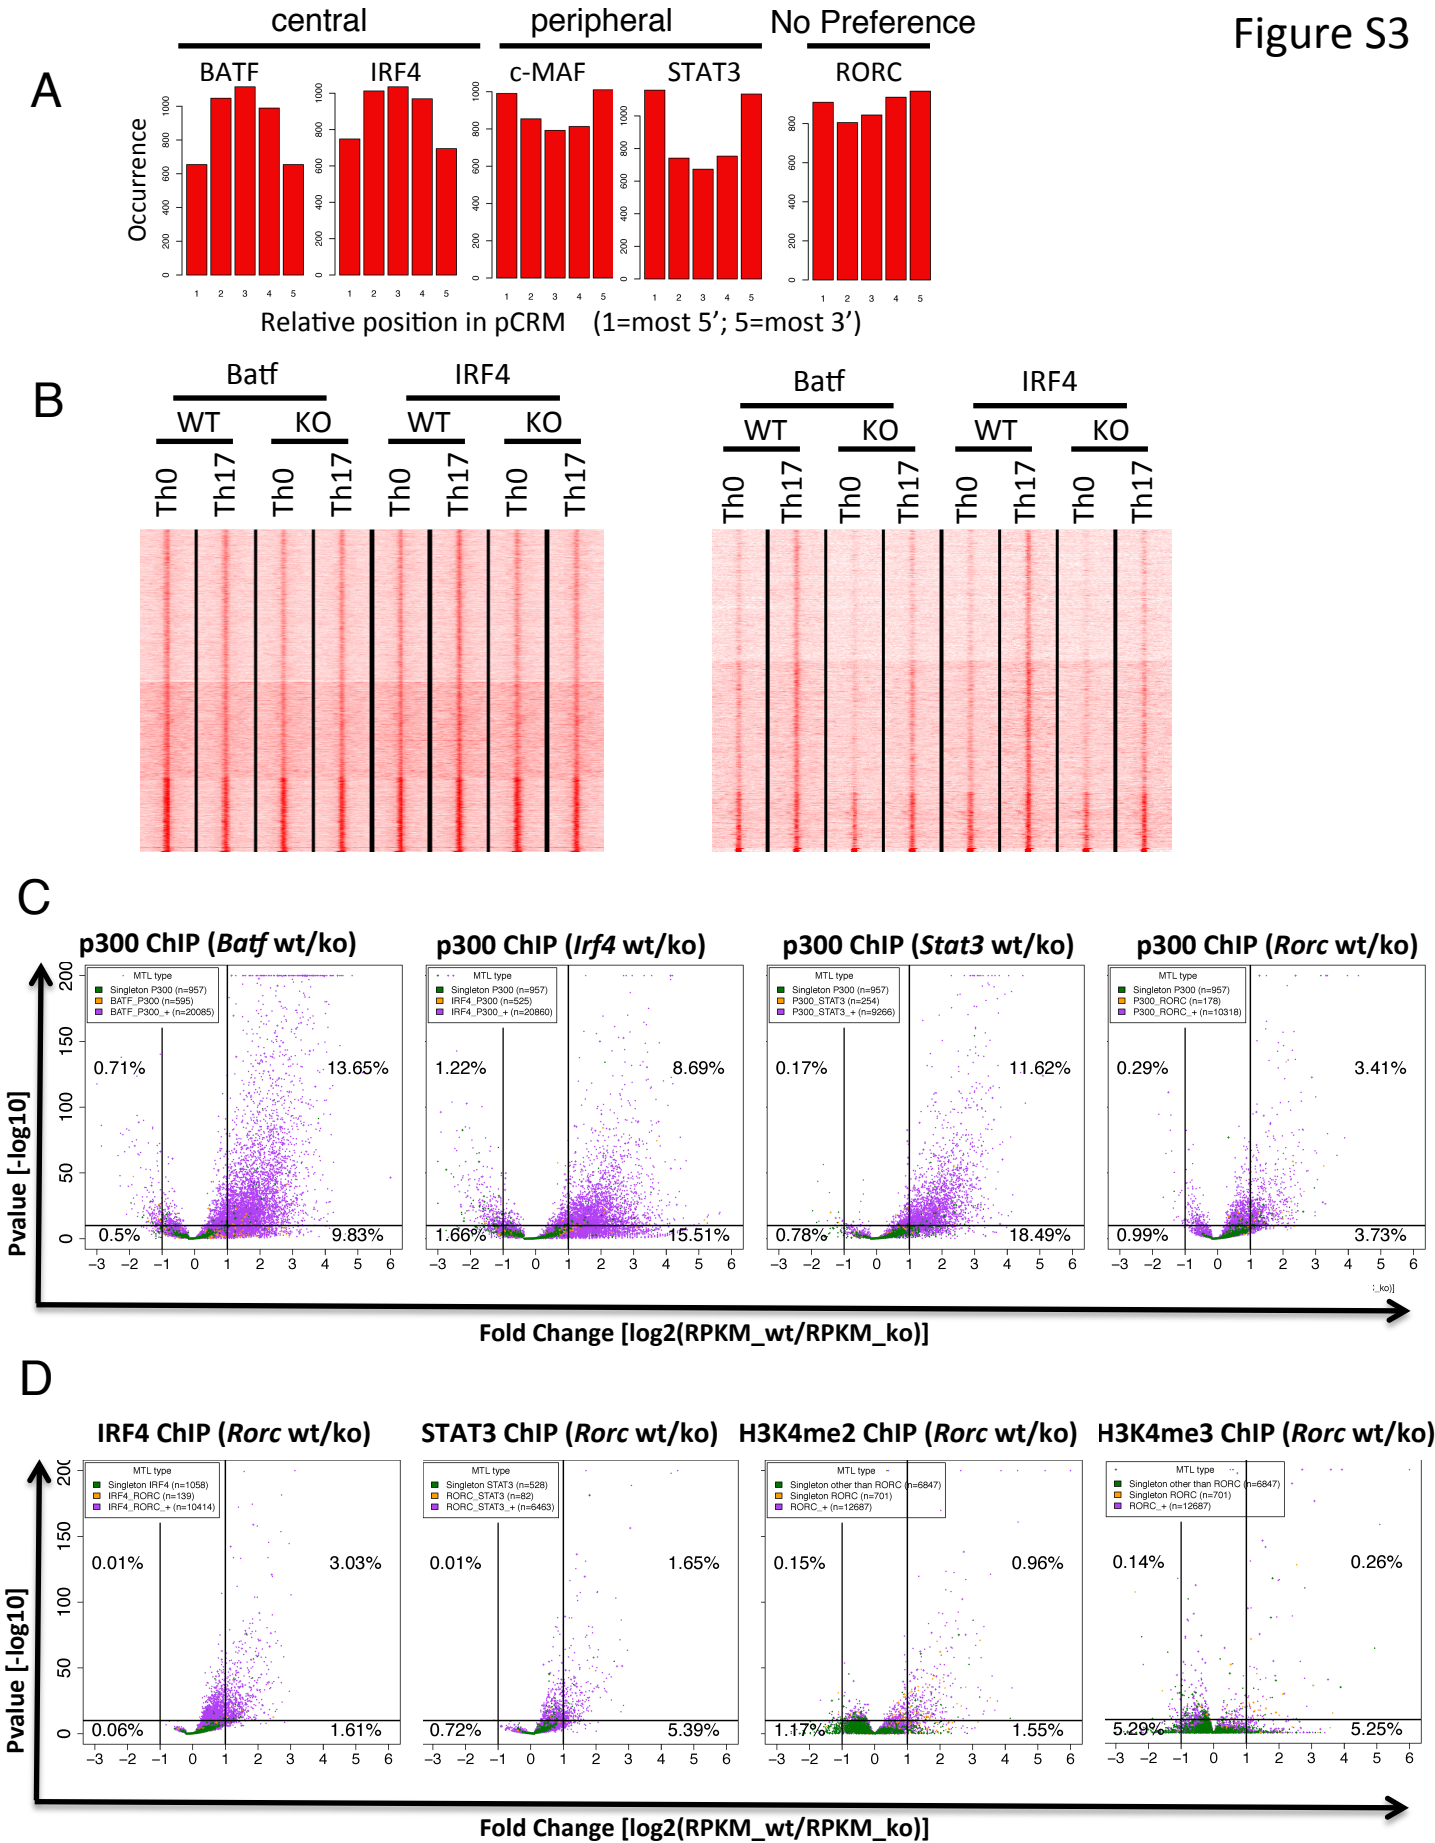

Supplement: NIHMS415202-supplement-Figure_S3.pdf [file NIHMS415202-supplement-Figure_S3.pdf]

Figure S4

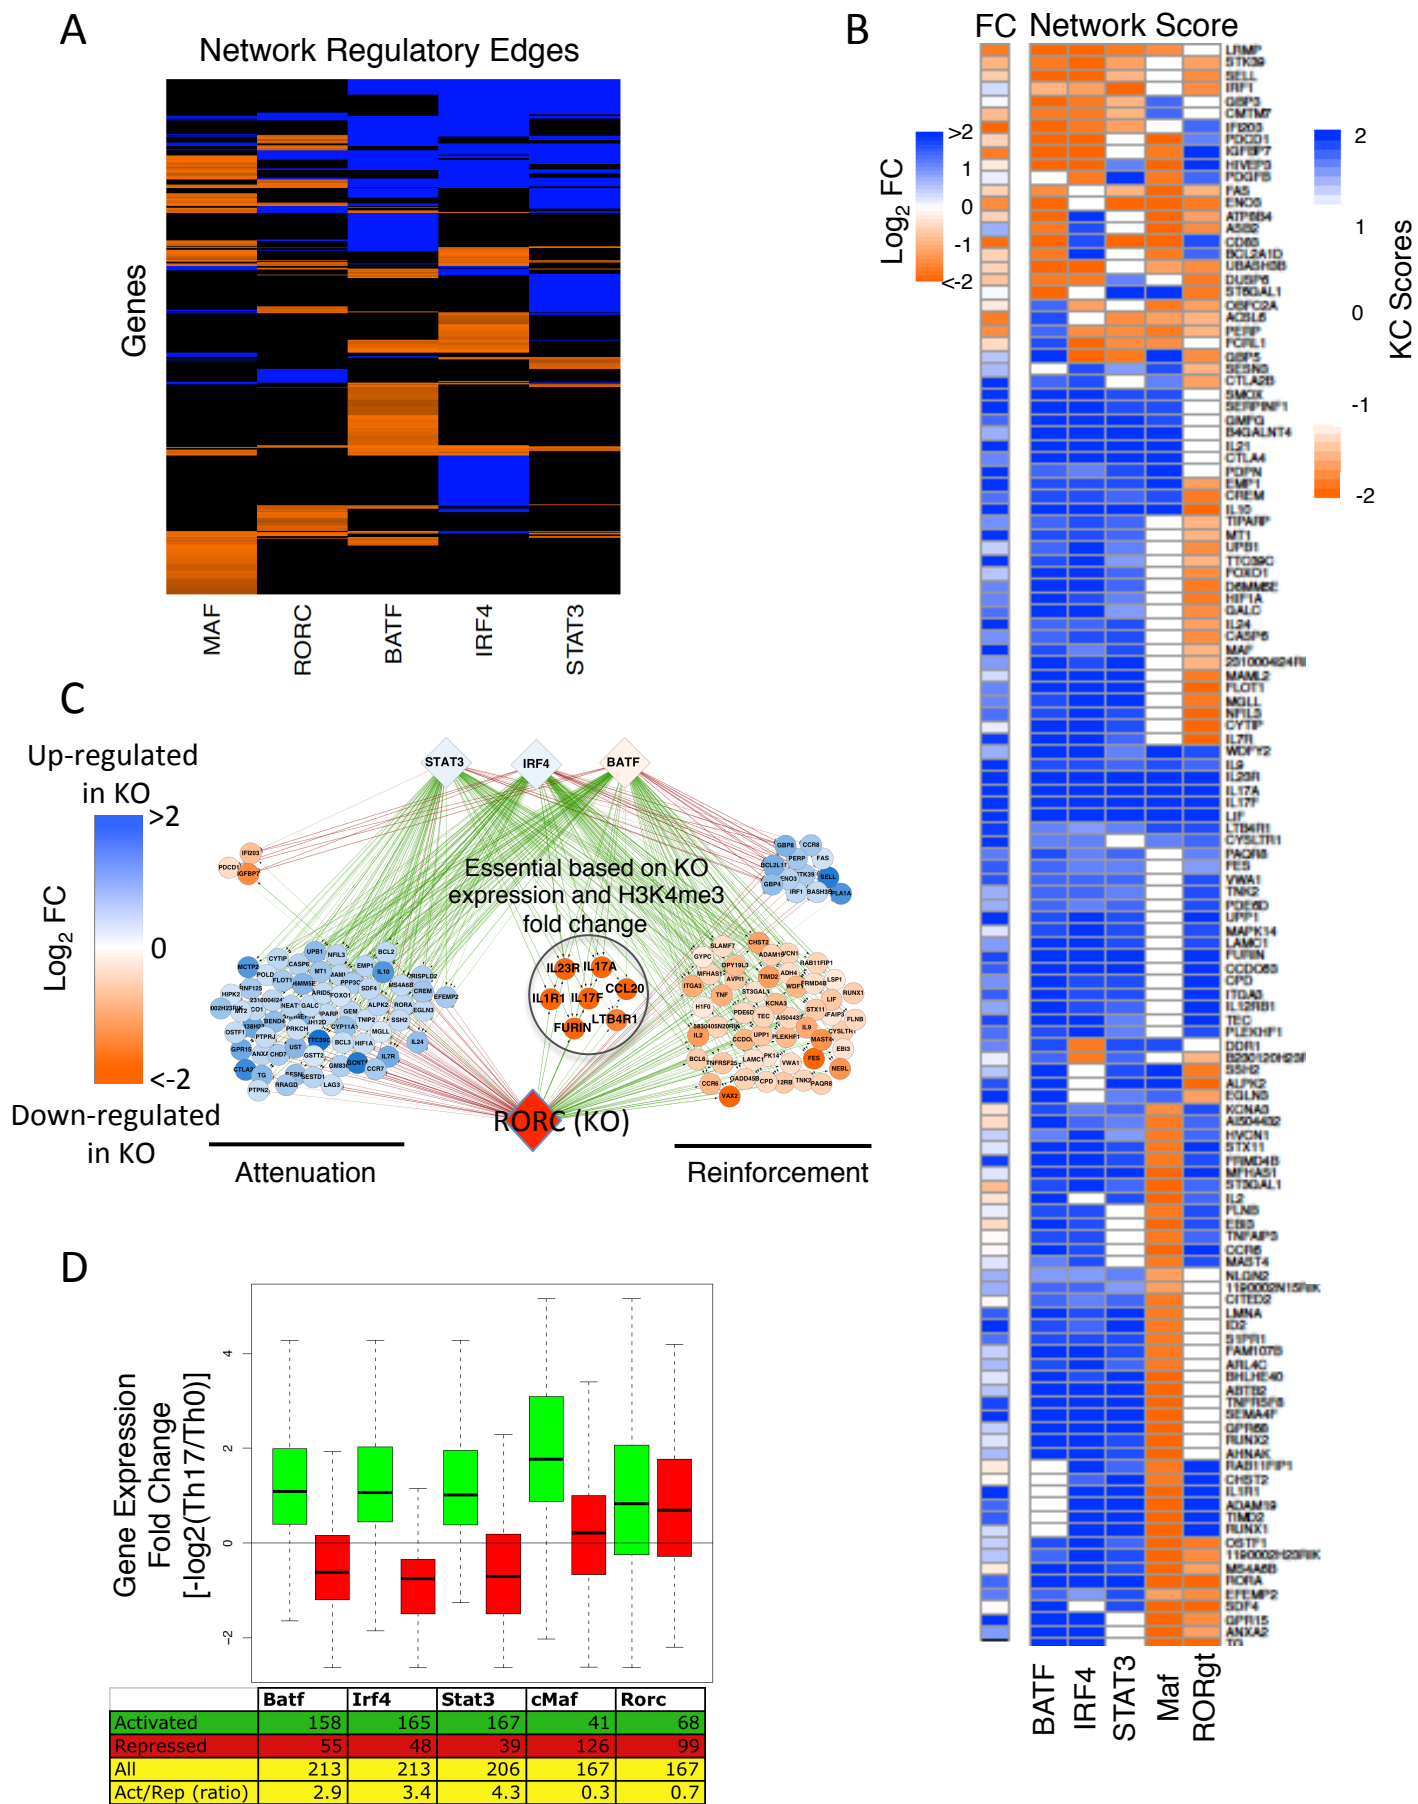

Supplement: NIHMS415202-supplement-Figure_S4.pdf [file NIHMS415202-supplement-Figure_S4.pdf]

Figure S6

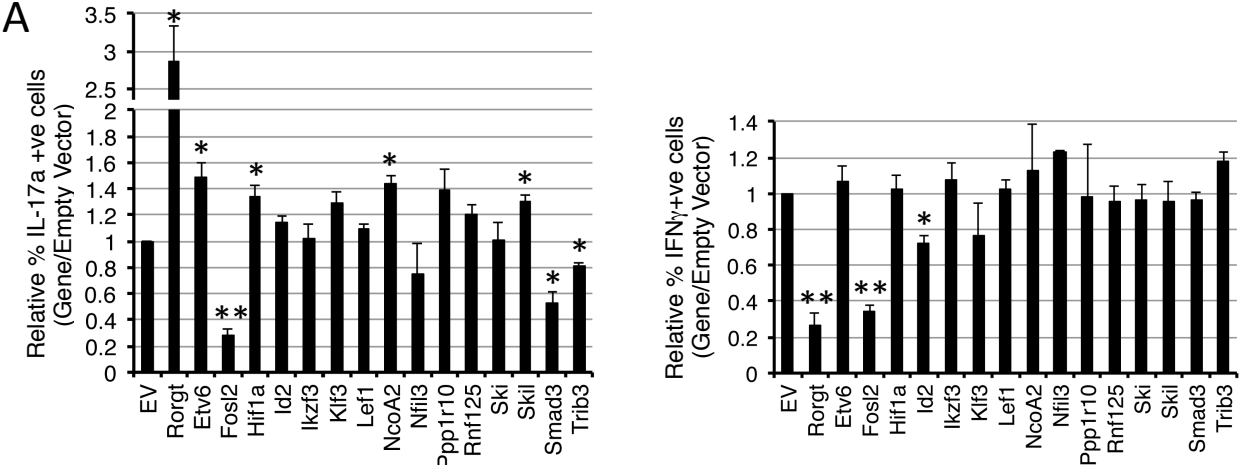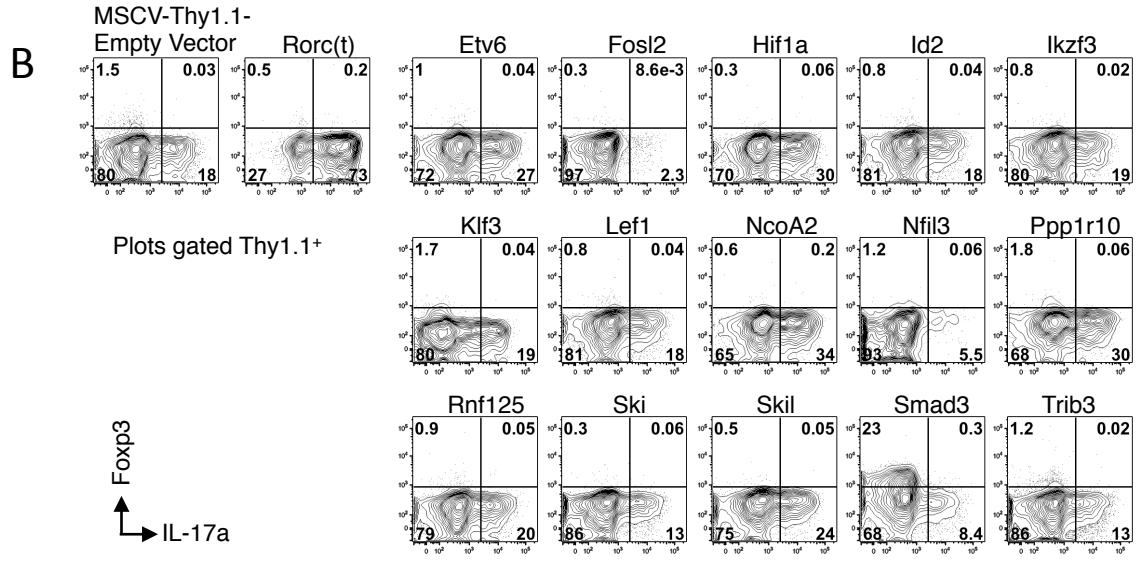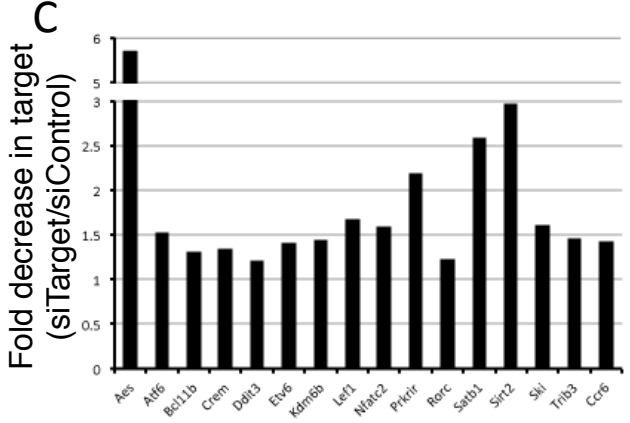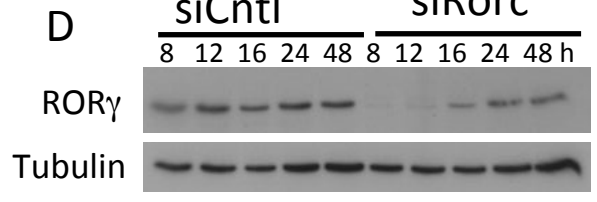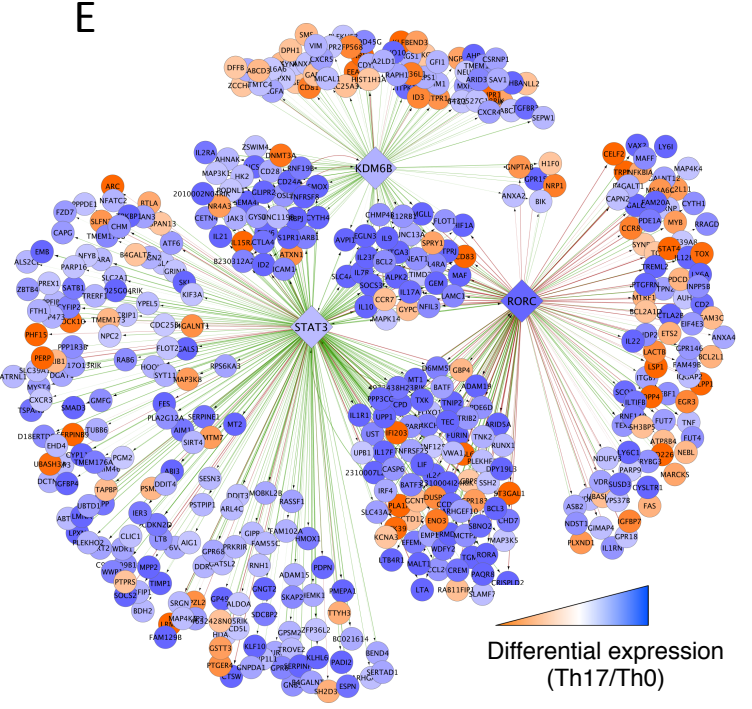

Supplement: NIHMS415202-supplement-Figure_S6.pdf [file NIHMS415202-supplement-Figure_S6.pdf]

Figure S7

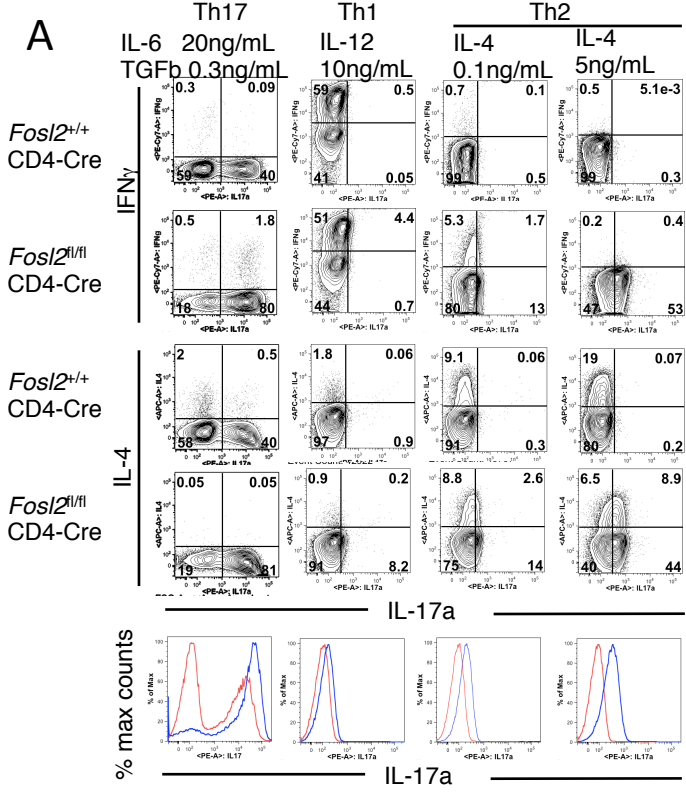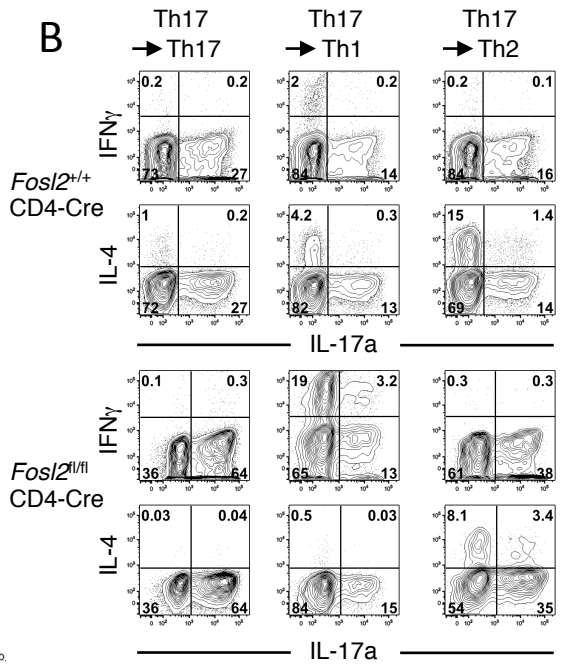

**C** AP-1 motif from ChIP (Th17)

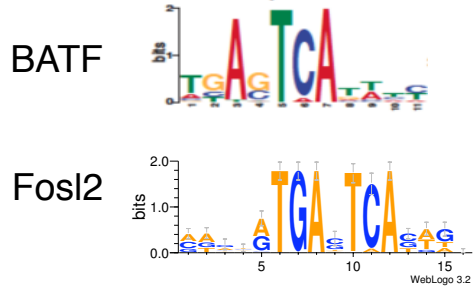

**D**

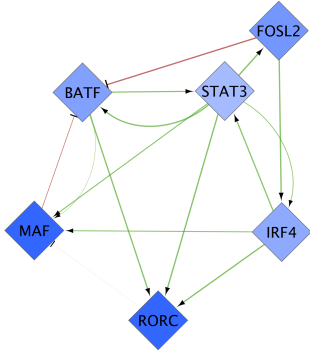

Supplement: NIHMS415202-supplement-Figure_S7.pdf [file NIHMS415202-supplement-Figure_S7.pdf]
